## Minireview

# Direct and Indirect Regulation of Gonadotropin-Releasing Hormone Neurons by Estradiol<sup>1</sup>

Sandra L. Petersen,<sup>2</sup> Erich N. Ottem, and Clifford D. Carpenter

Department of Biology, Neuroscience and Behavior Graduate Program, Center for Neuroendocrine Studies, University of Massachusetts, Amherst, Massachusetts 01003

### ABSTRACT

Estrogen signaling to GnRH neurons is critical for coordinating the preovulatory surge release of LH with follicular maturation. Until recently it was thought that estrogen signaled GnRH neurons only indirectly through numerous afferent systems. This minireview presents new evidence indicating that GnRH neurons are directly regulated by estradiol (E<sub>2</sub>), primarily through estrogen receptor (ER)- $\beta$ , and indirectly through E<sub>2</sub>-sensitive neurons in the anteroventral periventricular (AVPV) region. The data described suggest that E<sub>2</sub> generally represses GnRH gene expression but that this repression is transiently overcome by indirect E<sub>2</sub>-dependent signals relayed by AVPV neurons. We also present evidence that the AVPV neurons responsible for relaying E<sub>2</sub> signals to GnRH neurons are multifunctional gamma aminobutyric acid-ergic/glutamatergic/neuropeptidergic neurons.

*estradiol, glutamate, gonadotropin-releasing hormone, luteinizing hormone, neuroendocrinology*

### INTRODUCTION

Tightly regulated communication between the ovary and brain ensures that the neural signal for ovulation occurs when ovarian follicles are mature. A critical component of this communication system is the estrogen-dependent regulation of GnRH synthesis and hypersecretion that precedes a preovulatory surge in LH release. Understanding the neural mechanisms through which estradiol (E<sub>2</sub>) regulates GnRH neurons has been the goal of numerous studies over the past three decades. Early evidence indicated that few GnRH neurons had estrogen receptors (ER), thus research efforts have been focused on identifying afferent neurons that communicate E<sub>2</sub> signals to GnRH neurons. As a result, researchers have found numerous brain regions and neurotransmitters that are regulated by E<sub>2</sub> and are important for GnRH and LH surge release [1–7]. These findings led to the hypothesis that E<sub>2</sub> regulates GnRH neurons indirectly through many afferent neurotransmitter and neuromodulatory systems. In this minireview, we present recent evi-

dence indicating that it is now appropriate to refine this long-standing concept.

### IN VITRO EVIDENCE THAT GnRH-EXPRESSING CELL LINES CONTAIN ER

A fundamental question regarding steroid effects on GnRH neurons is whether these effects are exerted directly or indirectly. In one of the first efforts to address this issue, Shivers et al. [8] found only rare immunoreactive GnRH (irGnRH) neurons that concentrated tritiated E<sub>2</sub> in ovariectomized (OVX) rats. Subsequent work using double-label immunocytochemistry (ICC) [9–16] verified that few, if any, GnRH neurons in females of a variety of species contain ER. The results of these early studies led to the logical and generally accepted conclusion that GnRH neurons are not regulated directly by E<sub>2</sub>.

Until recently, the main challenge to this dogma came from investigators using immortalized GnRH neurons of the GT1 and GN lines [17, 18]. These cells overcome the problem that GnRH neurons in vivo are few in number and scattered throughout the preopticohypothalamus, making biochemical analyses difficult. Results of initial studies showed that GT1 cells have specific binding sites for E<sub>2</sub>, albeit at significantly lower concentrations than in ER-containing neurons in the preoptic area [POA] [19]. Studies in GN cells derived from an olfactory bulb tumor, and possibly representative of less mature GnRH neurons, also contain high-affinity ER binding sites in cell nuclei [20]. These findings were not widely accepted, largely because the weight of evidence argued against the presence of ER in GnRH neurons in vivo. Moreover, it was suggested that tumor-derived GT1 cells may behave as embryonic rather than adult GnRH neurons [21]. Therefore, the conclusion that GnRH neurons are regulated only indirectly by E<sub>2</sub> generally persisted and directed much of the research in the field.

Recent findings resulting from the discovery of a second ER isoform (ER $\beta$ ) [22] and from the introduction of more sensitive techniques indicate that it may have been premature to conclude that GnRH neurons are not regulated directly by E<sub>2</sub> (see also [23]). Using reverse transcription polymerase chain reaction (RT-PCR) and Southern blots, researchers found mRNA encoding ER $\alpha$  [24, 25] and ER $\beta$  [25] in GT1 cells. Others confirmed the presence of ER $\alpha$  mRNA in a subset of GT1-7 cells [26] and found both ER $\alpha$  and ER $\beta$  proteins in these cells [25, 27]. Using ICC, investigators found that although only 7%–11% of GT1-7 cells contain irER $\alpha$  [27], nearly all have irER $\beta$  [28]. At least one of these receptors appears to be functional because

<sup>1</sup>This work was supported by NIH grant HD27305 to S.L.P.

<sup>2</sup>Correspondence: Sandra L. Petersen, Department of Biology, 611 North Pleasant St., Morrill Science Center II-South, University of Massachusetts, Amherst, MA 01003. FAX: 413 545 3243; e-mail: sandyp@bio.umass.edu

Received: 28 May 2003.

First decision: 16 June 2003.

Accepted: 15 July 2003.

© 2003 by the Society for the Study of Reproduction, Inc.

ISSN: 0006-3363. <http://www.biolreprod.org>

$E_2$  regulates the activity of a minimal promoter construct containing tandem estrogen response element (ERE) sequences when the promoter is transiently transfected into GT1-7 cells [24]. These findings provide support for the idea that initial binding studies in GT1 cells identified bona fide ER and suggest that ER $\beta$  predominates in these cells.

### IN VITRO EVIDENCE THAT GnRH NEURONS CONTAIN FUNCTIONAL ER

Similar to results of studies in GT1 cells, accumulating *in vivo* evidence indicates that GnRH neurons also express ER $\beta$  preferentially. Earlier studies that failed to show ER in GnRH neurons generally used antibodies specific for ER $\alpha$ , suggesting that this isoform was not present. However, Coen and coworkers [27] subsequently used fixation procedures that maximize detectability of irER $\alpha$  and found a small percentage of ER $\alpha$ -positive GnRH neurons. To date no other researchers have replicated these findings nor have recent investigations using sensitive techniques detected ER $\alpha$  mRNA in GnRH neurons in mice [23] or rats [29]. (One group of investigators suggested that GnRH neurons contain ER $\alpha$  mRNA [30] but subsequently reported this finding to be in error [23].) GnRH neurons may express ER $\alpha$ , but at very low levels. An alternative explanation for discrepancies among results is that under some fixation conditions antibodies to ER $\alpha$  may recognize proteins with similar structural features. For example, the gene encoding ER-related receptor  $\alpha$  (ERR $\alpha$ ), one of a family of proteins structurally similar to ER [31], is detected in GnRH neurons [23, 30]. In particular, the DNA binding domain and hinge regions of ERRs are similar to those of ER $\alpha$ . Therefore, it is interesting that these domains [32] were targeted for production of the ER $\alpha$  antibodies used to detect ER $\alpha$  in GnRH neurons [27]. It remains to be determined whether different fixatives alter structures such that these antibodies could recognize ERRs.

Consistent with evidence that ER $\beta$  predominates in GT1 cells, a consensus is emerging that native GnRH neurons express ER $\beta$  preferentially. In rats, a sensitive dual-label *in situ* hybridization histochemical (ISHH) study revealed that as many as 73.8% of GnRH neurons contain ER $\beta$  mRNA [33]. Based on evidence that the proportion of GnRH neurons with ER $\beta$  immunoreactivity ranges from approximately 64% [28] to 88% [29] in OVX rats, it appears that this mRNA is translated into protein. There is also evidence that GnRH neurons in mice express the ER $\beta$  gene; however, this work relied on morphological identification of native GnRH neurons *in situ* and analyzed them with single-cell RT-PCR approach [30]. As a result of the practical constraints of this innovative approach, <50 GnRH neurons were examined from a total of 22 adult animals, and neurons were sampled only if they had a clear bipolar morphology. Therefore, as suggested by Herbison and Pape [23], results of this study probably underestimate the proportion of GnRH neurons with ER $\beta$  mRNA. One previous study using combined ISHH and ICC failed to colocalize ER- $\beta$  mRNA with irGnRH [34]. However, we [35] and others [36, 37] have found that fixation procedures similar to those used in that study increase background and dramatically decrease ISHH signal. Therefore, although combined ISHH and ICC is a useful approach for determining colocalization when both targets are abundant, it may not be sufficiently sensitive to detect ER $\beta$  mRNA in GnRH neurons.

Very few studies have investigated the regulation of ER $\beta$

expression in GnRH neurons. Work from Coen and coworkers [28] indicates that administration of 1.0  $\mu$ g  $E_2$  3.5 h before death reduces the proportion of GnRH neurons with detectable irER $\beta$  by less than 10%, whereas administration of a 50-fold higher dose of  $E_2$  16 h before death reduces this proportion by half. Although we found that the percentage of GnRH neurons with ER $\beta$  mRNA did not change as a result of  $E_2$  administration 48 h before the animals were killed [33], we did not measure changes in cellular levels of ER $\beta$  in GnRH neurons. This is an important caveat because our ISHH method is quite sensitive; therefore, we have yet to detect a significant difference in the number of cells expressing a particular mRNA, even when we observe dramatic changes in cellular levels of that mRNA. Therefore, it remains to be determined whether  $E_2$  reduces ER $\beta$  gene expression in individual GnRH neurons in rats. Skynner et al. [30] found no significant differences in the percentage of GnRH neurons containing ER $\beta$  mRNA among mice examined at diestrus, proestrus, and estrus. However, the small numbers of observations in that study may have been insufficient to provide the statistical power necessary to detect differences among groups.

Despite the convincing evidence that GnRH neurons primarily synthesize the ER $\beta$  isoform, the functional significance of this finding is unclear. The first question is whether ER $\beta$  binds  $E_2$  in native GnRH neurons. *In vivo* autoradiographic studies using 17 $\alpha$ -iodovinyl-11 $\beta$ -methoxyestradiol as an ER ligand [33] detected more  $E_2$ -concentrating GnRH neurons than did the original studies using a tritiated ligand [8]. However, despite the use of the higher specific activity ligand, ER binding was detected in <10% of GnRH neurons [33]. One interpretation of these data is that although ER- $\beta$  mRNA appears to be translated into protein in a majority of GnRH neurons, the protein is functional in only a very small subpopulation of these neurons. Another possibility is that ER binding in GnRH neurons is underestimated by the technique of *in vivo* autoradiography.

A second question is whether activation of ER $\beta$  in GnRH neurons alters the functioning of these cells. A very recent report shows that  $E_2$  rapidly increases the phosphorylation of cAMP response element-binding protein (CREB) in GnRH neurons in wild-type and ER $\alpha$  knockout but not ER $\beta$  knockout mice [38]. Using slice preparations and tetrodotoxin to electrically isolate neurons, the authors verified that CREB phosphorylation by  $E_2$  was at least partially mediated by a direct action on GnRH neurons. This finding is consistent with previous evidence that  $E_2$  directly and rapidly alters GnRH electrical excitability [39] and suggests that activation of ER $\beta$  in GnRH neurons may alter the responsiveness of these cells to other stimuli.

### IN VITRO EVIDENCE THAT $E_2$ DIRECTLY REGULATES GnRH GENE TRANSCRIPTION

Several possible functions for ER in GnRH neurons have been reviewed recently [23]. In this minireview, we limit our focus to effects of  $E_2$  on the regulation of GnRH gene expression, a key step in the regulation of GnRH biosynthesis. Although another gene encoding GnRH II has also been found in human brain [40], there is little information available on the regulation of this gene in neuronal cells [41]. Therefore, we concentrate here on studies investigating  $E_2$  regulation of GnRH-1 (hereinafter referred to as GnRH).

Early work showed that  $E_2$  stimulates human GnRH promoter activity through ER binding to a putative ERE [42].

Subsequently, it was found that transcription of the human gene can be initiated at two different start sites and that an upstream site is used primarily in reproductive tissues and a downstream site is used in hypothalamic neurons [43, 44]. In nonneural cell lines, researchers detected both stimulatory and inhibitory EREs in the upstream promoter [45]. In contrast, the rather low level of basal reporter activity of the neuron-specific downstream site is not significantly affected by E<sub>2</sub> [46]. Unlike human [43, 44] and monkey [47] GnRH genes, specific upstream transcriptional start sites do not appear to be used in the regulation of GnRH gene expression in nonneural tissue of rats [47]. Nevertheless, several regions of the rat GnRH promoter region confer negative regulatory responsiveness to E<sub>2</sub> [48]. Although ER $\alpha$  is required for this inhibitory effect, the receptor does not bind directly to the putative ERE sequence in the GnRH promoter [46] nor does ER $\alpha$  bind ERE in the upstream promoter of human GnRH [43]. Thus, the promoter regions of GnRH genes in several species appear to be negatively regulated by E<sub>2</sub> through ER, but some regulatory responses may involve indirect effects of liganded ER $\alpha$  at putative ERE sites.

The studies described above relied on introduction of ER $\alpha$  expression vectors and specific reporter constructs into cells to determine the effects of E<sub>2</sub> on GnRH promoter activity. No studies have determined whether ER $\beta$  mediates E<sub>2</sub> effects on the promoter. Since the discovery that GT1 cells contain endogenous ER $\alpha$  and ER $\beta$ , researchers have begun to investigate the role of each isomer in the regulation of GnRH gene expression. In agreement with results of transient transfection studies described above, E<sub>2</sub> represses mouse GnRH gene expression in GT1-7 cells [25]. This effect is blocked by ICI 182,780, an ER antagonist that inhibits both ER $\alpha$  and ER $\beta$  activities, and is mimicked by 2,2-bis-(*p*)-hydroxyphenyl-1,1,1-trichloroethan [25], a putative ER $\alpha$  agonist and ER $\beta$  antagonist, in several cell lines [49]. These data suggest that ER $\alpha$  may be responsible for repressive effects of E<sub>2</sub> on GnRH gene expression. This idea is supported by recent findings that E<sub>2</sub> suppression of GnRH mRNA levels in GT1-7 cells is not antagonized by *R,R*-diethyltetrahydrochrysenes (*R,R*-THC) [50], an ER $\beta$  antagonist [51, 52] with partial [51, 52] or no [53] ER $\alpha$  agonist activity. However, the phytoestrogen coumestrol also suppresses GnRH gene expression and *R,R*-THC blocks that suppression, suggesting that ER $\beta$  mediates the effect. In summary, the preponderance of *in vitro* evidence indicates that E<sub>2</sub> negatively regulates neural relevant GnRH promoter activity and that both ER $\alpha$  and ER $\beta$  are active in GT1 cell lines.

### E<sub>2</sub> REGULATION OF GnRH GENE EXPRESSION IN VIVO

It is difficult to demonstrate that E<sub>2</sub> directly represses GnRH transcription *in vivo*, but results of studies in mammals, including humans, are consistent with this idea. In one of the first studies to address this issue, E<sub>2</sub> suppressed GnRH mRNA in OVX rats [54], a finding that has been verified in adult OVX rats [55, 56] and in explant cultures prepared from Postnatal Day 4 rats [57]. More recent work demonstrated that E<sub>2</sub> from ovarian and extraovarian sources depresses GnRH gene expression in rats [58]. E<sub>2</sub> also decreases GnRH mRNA levels in neurons of sheep POA [59, 60]; however, this decrease is transient and occurs at the onset of and during LH surge release. Work on human brain identified region-specific GnRH neuronal subtypes and pro-

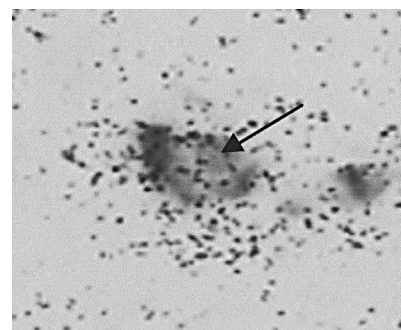

FIG. 1. Results of dual-label ISHH analysis using digoxigenin-labeled cRNA probes for GnRH mRNA (indicated by arrow) and <sup>33</sup>P-labeled cRNA probes for the mRNA encoding the R1 subunit of the GABA<sub>B</sub> receptor (black grains).

vided evidence that GnRH mRNA levels are suppressed by steroids only in type I neurons found in the medial basal hypothalamus [61]. E<sub>2</sub> also suppresses GnRH gene expression in nonhuman primates [62] and, similar to humans, does so specifically in type 1 GnRH neurons [63].

Despite this convincing evidence that E<sub>2</sub> decreases GnRH gene expression *in vitro* and in several *in vivo* models, not all investigators found such effects. As a result, the issue was debated in the literature for several years. Work showing that E<sub>2</sub> has time- and region-specific effects on GnRH gene expression in OVX rats largely reconciles these data as described previously [5, 56]. Specifically, E<sub>2</sub> treatment decreases GnRH mRNA levels during the periods prior to and following LH surge release in adult OVX rats [54]. In contrast, levels in E<sub>2</sub>-treated OVX animals are similar to or above levels in OVX animals several hours before and during the surge [56, 64]. Consequently, investigators examining animals during the early morning hours on the day of the surge found E<sub>2</sub>-dependent suppression of GnRH gene expression [54–56], whereas researchers who examined levels at mid-morning or late afternoon found no differences [56, 65–67]. When levels were examined during early to mid-afternoon, a stimulatory effect of E<sub>2</sub> was often seen [56, 65, 68, 69]. The stimulatory effect of E<sub>2</sub> occurs preferentially in rostral populations of GnRH neurons [56] and may be masked if tissue samples including the entire POA are assayed. These data emphasize the importance of considering time of day, animal model, and brain region when evaluating the effects of steroids on GnRH neurons.

### INDIRECT REGULATION OF GnRH GENE EXPRESSION BY E<sub>2</sub>—ROLE OF THE ANTEROVENTRAL PERIVENTRICULAR REGION

The findings described above indicate that E<sub>2</sub> may repress GnRH gene expression *in vivo* as it represses GnRH promoter activity *in vitro*. On the day of LH surge release, this repression is overcome by an afferent signal that is indirectly triggered by E<sub>2</sub> and necessary for the surge [70]. Many brain regions and neural systems have been implicated as regulators of GnRH neurons in different animal models [1–7, 71, 72]. Here, we focus primarily on recent work that examined the role of the anteroventral periventricular (AVPV) region, the medial region of the POA lying just caudal to the organum vasculosum of the lamina terminalis (OVLt) and rostral to the suprachiasmatic nucleus (SCN) [73, 74] (previously referred to as the medial pre-



optic nucleus [MPN] [70, 75–78]). In rats, the AVPV region is a sexually dimorphic nucleus [79] with abundant ER $\alpha$  [80, 81] and ER $\beta$  [81] mRNAs and a high density of E<sub>2</sub>-concentrating cells [82]. This nucleus receives inputs from other brain regions that are critical for the daily LH surge, and therefore it is thought to be a key site for integrating and transducing environmental and hormonal signals to GnRH neurons [79].

The importance of the AVPV region in LH surge release in rats was first demonstrated by findings that electrolytic lesions of the region blocked the surge [76, 77], probably by destroying neurons required for the appropriate regulation of GnRH neurons [78]. Microimplants of antiestrogen placed into the AVPV region also blocked both the E<sub>2</sub>-induced LH surge release and the phasic increase in GnRH gene expression seen several hours before the surge [56]. In addition, neurons of the AVPV region project to the rostral POA [83], where the most dramatic effects of E<sub>2</sub> on GnRH gene expression have been observed [56]. A group of neurons in a medial subdivision of the AVPV region, designated the periventricular POA and found only in females (G. Hoffman, personal communication), is coactivated with GnRH neurons at the time of the LH surge [84]. Thus, it seems likely that ER-containing neurons in the AVPV region of rats may be responsible for overcoming direct repressive effects of E<sub>2</sub> on GnRH gene expression.

The E<sub>2</sub>-dependent LH surge release is seen in females but not in males, and the AVPV region has a number of sexually dimorphic E<sub>2</sub>-sensitive neurotransmitter/neuropeptide systems known to regulate LH release [5, 79]. In addition, consistent with evidence that a daily circadian signal is required for the afternoon LH surge, neurons from the SCN project to the AVPV region, where they synapse on ER-containing neurons [85, 86]. Therefore, it is intriguing that neurons in the AVPV region show a rise in cAMP concentrations in OVX animals and on all days of the estrous cycle [87]. Together, these data suggest that a daily circadian signal is communicated to AVPV neurons, where it is reflected in an increase in cAMP; however, only in females and only in the presence of E<sub>2</sub> is this signal communicated to GnRH neurons as a trigger for hypersecretion and LH surge release.

The identity of the AVPV neurons that communicate E<sub>2</sub> signals to GnRH neurons has yet to be established, but several lines of evidence suggest that gamma aminobutyric acid (GABA) neurons are likely candidates. First, GABA is abundant in the POA and plays a key role in the regulation of GnRH release and gene expression [88–91]. We recently found that virtually all GABA neurons in the AVPV region have ER $\alpha$  and/or ER $\beta$  mRNA (unpublished results). Considering that less than half of the GABA neurons in the POA of rats concentrate E<sub>2</sub> [92], AVPV GABA neurons appear to be a distinctive E<sub>2</sub>-sensitive subpopulation. This sensitivity may explain why GABA neurons in the AVPV region, but not in the rat POA, show E<sub>2</sub>-induced changes in glutamic acid decarboxylase 67 mRNA [93] that parallel changes in GABA release linked to the LH surge [94–96]. Another effect of E<sub>2</sub> in the AVPV region is to induce progesterin receptor (PR) gene expression [97], and this induction is required for E<sub>2</sub>-dependent LH surge release [98–100]. Therefore, it is significant that we recently showed that PR mRNA levels are increased by E<sub>2</sub> specifically in GABA neurons of the AVPV region (unpublished results). Finally, although it is not clear that AVPV GABA neurons project to GnRH neurons, GnRH neurons

have GABA<sub>A</sub> receptors [35, 101–104] and contain mRNA encoding the GABA<sub>B</sub> receptor (see Fig. 1). These findings provide convincing evidence that GABA neurons in the AVPV region are important for transmitting E<sub>2</sub>-dependent signals to GnRH neurons.

Like GABA, glutamate is abundant in the POA [105], and its release is regulated by E<sub>2</sub> [95, 106]. Activation of glutamate receptors stimulates both GnRH gene expression and LH release [107–109]. This activation is probably direct because GnRH neurons express *N*-methyl-D-aspartate R1 mRNA [110] and protein [108, 111, 112] and metabotropic glutamate receptors [113, 114]. Until recently, there was no reliable marker of glutamatergic neurons, making it difficult to localize and characterize these neurons. Identification of vesicular glutamate transporters (VGLUT-1, -2, and -3) and characterization of these molecules as Na<sup>+</sup>/inorganic P cotransporters responsible for loading glutamate into synaptic vesicles [115–123] established them as specific markers of glutamatergic neurons. Researchers showed recently that VGLUT-2 is the predominant isoform in the preopticohypothalamus [122–127] and that VGLUT-2 mRNA-containing cells are found in the AVPV region [127–129].

Researchers have generally assumed that GABA and glutamate are released from separate neurons in the AVPV region, but until now it was not possible to critically test this hypothesis. We recently made the surprising discovery that all VGLUT-2 mRNA in the AVPV region occurs in GABA neurons and that numerous terminals in the rat POA contain both VGLUT-2 and vesicular GABA transporter proteins (unpublished results). Others have detected terminals containing VGLUT-2 protein on GnRH cell bodies [129, 130] and shown that some of these terminals also contain synaptophysin [129]. These findings suggest the intriguing possibility that dual-function GABA/glutamate neurons in the AVPV region contain ER and directly regulate GnRH neurons.

It is also possible that these AVPV GABAergic/glutamatergic neurons are also neuropeptidergic. This idea is based on our findings that most ER $\alpha$  and ER $\beta$  expression is found in GABA neurons and that a high percentage of some neuropeptidergic neurons in the AVPV also contain ER [5, 79]. One of these peptides, neurotensin (NT), is regulated by E<sub>2</sub>, shows sexually dimorphic expression, and augments LH surge release [131–136]. Our preliminary studies show that virtually all NT mRNA is found in GABA neurons in the AVPV region and adjoining MPN. Studies in progress will determine whether other sexually dimorphic neuropeptides are also expressed in GABAergic/glutamatergic neurons of the AVPV region.

These findings suggest that GABAergic/glutamatergic/neuropeptidergic neurons of the AVPV region are targets of E<sub>2</sub> and are likely candidates for regulating phasic increases in GnRH synthesis prior to the induction of LH surge release. More research is necessary to determine how release of neurotransmitters from these multifunctional AVPV neurons is coordinated by E<sub>2</sub> and by afferent signals.

## REFERENCES

1. Kalra SP. Mandatory neuropeptide-steroid signaling for the preovulatory luteinizing hormone-releasing hormone discharge. *Endocr Rev* 1993; 14:507–538.
2. Barraclough CA. Neurotransmitter regulation of luteinizing hormone-releasing hormone neuronal function. *Acta Biol Hung* 1994; 45:189–206.
3. Wuttke W, Jarry H, Feleder C, Moguilevsky J, Leonhardt S, Seong

- JY, Kim K. The neurochemistry of the GnRH pulse generator. *Acta Neurobiol Exp (Warsz)* 1996; 56:707–713.
4. Levine JE. New concepts of the neuroendocrine regulation of gonadotropin surges in rats. *Biol Reprod* 1997; 56:293–302.
  5. Herbison AE. Multimodal influence of estrogen upon gonadotropin-releasing hormone neurons. *Endocr Rev* 1998; 19:302–330.
  6. Mahesh VB, Brann DW. Neuroendocrine mechanisms underlying the control of gonadotropin secretion by steroids. *Steroids* 1998; 63:252–256.
  7. McCann SM, Karanth S, Mastronardi CA, Dees WL, Childs G, Miller B, Sower S, Yu WH. Hypothalamic control of gonadotropin secretion. *Prog Brain Res* 2002; 141:151–164.
  8. Shivers BD, Harlan RE, Morrell JI, Pfaff DW. Absence of oestradiol concentration in cell nuclei of LHRH immunoreactive neurons. *Nature* 1983; 304:345–347.
  9. Watson REJ. Further evidence that most luteinizing hormone-releasing hormone neurons are not directly estrogen-responsive: simultaneous localization of luteinizing hormone-releasing hormone and estrogen receptor immunoreactivity in the guinea-pig brain. *J Neuroendocrinol* 1992; 4:311–317.
  10. Herbison AE, Theodosis DT. Localization of oestrogen receptors in preoptic neurons containing neurotensin but not tyrosine hydroxylase, cholecystokinin or luteinizing hormone-releasing hormone in male and female rat. *Neuroscience* 1992; 50:283–298.
  11. Herbison AE, Robinson JE, Skinner DC. Distribution of estrogen receptor-immunoreactive cells in the preoptic area of the ewe: colocalisation with glutamic acid decarboxylase but not luteinizing hormone-releasing hormone. *Neuroendocrinology* 1993; 57:751–759.
  12. Lehman MN, Karsch FJ. Do gonadotropin-releasing hormone, tyrosine hydroxylase-, and beta-endorphin-immunoreactive neurons contain estrogen receptors? A double-label immunocytochemical study in the Suffolk ewe. *Endocrinology* 1993; 133:887–895.
  13. Navas JM, Anglade I, Bailhache T, Pakdel F, Breton B, Jegou P, Kah O. Do gonadotrophin-releasing hormone neurons express estrogen receptors in the rainbow trout? A double immunohistochemical study. *J Comp Neurol* 1995; 363:461–474.
  14. Herbison AE, Horvath TL, Naftolin F, Leranath C. Distribution of estrogen receptor-immunoreactive cells in monkey hypothalamus: relationship to neurones containing luteinizing hormone-releasing hormone and tyrosine hydroxylase. *Neuroendocrinology* 1995; 61:1–10.
  15. Sullivan KA, Witkin JW, Ferin M, Silverman AJ. Gonadotropin-releasing hormone neurons in the rhesus macaque are not immunoreactive for the estrogen receptor. *Brain Res* 1995; 685:198–200.
  16. Warembourg M, Leroy D, Peytevin J, Martinet L. Estrogen receptor and progesterone receptor-immunoreactive cells are not co-localized with gonadotropin-releasing hormone in the brain of the female mink (*Mustela vison*). *Cell Tissue Res* 1998; 291:33–41.
  17. Mellon PL, Windle JJ, Goldsmith PC, Padula CA, Roberts JL, Weiner RI. Immortalization of hypothalamic GnRH neurons by genetically targeted tumorigenesis. *Neuron* 1990; 5:1–10.
  18. Radovick S, Wray S, Lee E, Nicols DK, Nakayama Y, Weintraub BD, Westphal H, Cutler GB Jr, Wondisford FE. Migratory arrest of gonadotropin-releasing hormone neurons in transgenic mice. *Proc Natl Acad Sci U S A* 1991; 88:3402–3406.
  19. Poletti A, Melcangi RC, Negri-Cesi P, Maggi R, Martini L. Steroid binding and metabolism in the luteinizing hormone-releasing hormone-producing neuronal cell line GT1-1. *Endocrinology* 1994; 135:2623–2628.
  20. Radovick S, Wray S, Muglia L, Westphal H, Olsen B, Smith E, Patriquin E, Wondisford FE. Steroid hormone regulation and tissue-specific expression of the human GnRH gene in cell culture and transgenic animals. *Horm Behav* 1994; 28:520–529.
  21. Selmanoff M. Commentary on the use of immortalized neuroendocrine cell lines for physiological research. *Endocrine* 1997; 6:1–3.
  22. Kuiper GGJM, Enmark E, Peltö-Huikko M, Nilsson S, Gustafsson JA. Cloning of a novel estrogen receptor expressed in rat prostate and ovary. *Proc Natl Acad Sci U S A* 1996; 93:5925–5930.
  23. Herbison AE, Pape JR. New evidence for estrogen receptors in gonadotropin-releasing hormone neurons. *Front Neuroendocrinol* 2001; 22:292–308.
  24. Shen ES, Meade EH, Perez MC, Deecher DC, Negro-Vilar A, Lopez FJ. Expression of functional estrogen receptors and galanin messenger ribonucleic acid in immortalized luteinizing hormone-releasing hormone neurons: estrogenic control of galanin gene expression. *Endocrinology* 1998; 139:939–948.
  25. Roy D, Angelini NL, Belsham DD. Estrogen directly represses gonadotropin-releasing hormone (GnRH) gene expression in estrogen receptor-alpha (ERalpha)- and ERbeta-expressing GT1-7 GnRH neurons. *Endocrinology* 1999; 140:5045–5053.
  26. Martinez-Morales JR, Morales A, Marin R, Hernandez-Jimenez JG, Acevedo A, Guerra B, Hernandez G, Lopez-Coviella I, Prieto L, Alonso R. Estrogen modulates norepinephrine-induced accumulation of adenosine cyclic monophosphate in a subpopulation of immortalized luteinizing hormone-releasing hormone secreting neurons from the mouse hypothalamus. *Neurosci Lett* 2001; 298:61–64.
  27. Butler JA, Sjöberg M, Coen CW. Evidence for oestrogen receptor alpha-immunoreactivity in gonadotrophin-releasing hormone-expressing neurones. *J Neuroendocrinol* 1999; 11:331–335.
  28. Kallo I, Butler JA, Barkovics-Kallo M, Goubillon ML, Coen CW. Oestrogen receptor  $\beta$ -immunoreactivity in gonadotropin releasing hormone-expressing neurones: regulation by oestrogen. *J Neuroendocrinol* 2001; 13:741–748.
  29. Hrabovszky E, Steinhäuser A, Barabas K, Shughrue PJ, Petersen SL, Merchenthaler I, Liposits Z. Estrogen receptor-beta immunoreactivity in luteinizing hormone-releasing hormone neurons of the rat brain. *Endocrinology* 2001; 142:3261–3264.
  30. Skynner MJ, Sim JA, Herbison AE. Detection of estrogen receptor alpha and beta messenger ribonucleic acids in adult gonadotropin-releasing hormone neurons. *Endocrinology* 1999; 140:5195–5201.
  31. Giguere V, Yang N, Segui P, Evans RM. Identification of a new class of steroid hormone receptors. *Nature* 1988; 331:91–94.
  32. Giguere V. To ERR in the estrogen pathway. *Trends Endocrinol Metab* 2002; 13:220–225.
  33. Hrabovszky E, Shughrue PJ, Merchenthaler I, Hajszan I, Carpenter CD, Liposits Z, Petersen SL. Detection of estrogen receptor-beta messenger ribonucleic acid and <sup>125</sup>I-estrogen binding sites in luteinizing hormone-releasing hormone neurons of the rat brain. *Endocrinology* 2000; 141:3506–3509.
  34. Laflamme N, Nappi RE, Drolet G, Labrie C, Rivest S. Expression and neuropeptidergic characterization of estrogen receptors (ERalpha and ERbeta) throughout the rat brain: anatomical evidence of distinct roles of each subtype. *J Neurobiol* 1998; 36:357–378.
  35. Petersen SL, McCrone S. Use of dual-label in situ hybridization histochemistry to determine the receptor complement of specific neurons. In: Valentino KL, Eberwine JJ, Barchas JD (eds.), *In Situ Hybridization Applications to Neurobiology*. New York: Oxford University Press; 1993:78.
  36. Higgins G, Wilson M. In situ hybridization for mapping the neuroanatomical distribution of novel brain mRNAs. In: Valentino K, Eberwine J, Barchas J (eds.), *In Situ Hybridization Applications to Neurobiology*. New York: Oxford University Press; 1987:151–152.
  37. Singer R, Lawrence J, Rashchian R. Toward a rapid and sensitive in situ hybridization methodology using isotopic and nonisotopic probes. In: Valentino J, Eberwine J, Barchas J (eds.), *In Situ Hybridization Applications to Neurobiology*. New York: Oxford University Press; 1987:76.
  38. Abraham IM, Han SK, Todman M, Korach K, Herbison AE. Estrogen receptor  $\beta$  mediates rapid estrogen actions on gonadotropin-releasing hormone (GnRH) neurons in vivo. *J Neuroscience* 2003; 23:5771–5777.
  39. Lagrange AH, Ronnekleiv OK, Kelly MJ. Estradiol-17 $\beta$  and  $\mu$ -opioid peptides rapidly hyperpolarize GnRH neurons: a cellular mechanism of negative feedback? *Endocrinology* 1995; 135:2341–2344.
  40. White RB, Eisen JA, Kasten TL, Fernald RD. Second gene for gonadotropin-releasing hormone in humans. *Proc Natl Acad Sci U S A* 1998; 95:305–309.
  41. Chen A, Zi K, Laskar-Levy O, Koch Y. The transcription of the hGnRH-I and hGnRH-II genes in human neuronal cells is differentially regulated by estrogen. *J Mol Neurosci* 2002; 18:67–76.
  42. Radovick S, Ticknor CM, Nakayama Y, Notides AC, Rahman A, Weintraub BD, Cutler GB Jr, Wondisford FE. Evidence for direct estrogen regulation of the human gonadotropin-releasing hormone gene. *J Clin Invest* 1991; 88:1649–1655.
  43. Dong KW, Yu KL, Roberts JL. Identification of a major up-stream transcription start site for the human progonadotropin-releasing hormone gene used in reproductive tissues and cell lines. *Mol Endocrinol* 1993; 7:1654–1666.
  44. Dong KW, Yu KL, Chen ZG, Chen YD, Roberts JL. Characterization of multiple promoters directing tissue-specific expression of the human gonadotropin-releasing hormone gene. *Endocrinology* 1997; 138:2754–2762.
  45. Dong KW, Chen ZG, Cheng KW, Yu KL. Evidence for estrogen receptor-mediated regulation of human gonadotropin-releasing hor-

- mone promoter activity in human placental cells. *Mol Cell Endocrinol* 1996; 117:241–246.
46. Chen Z, Zheng H, Dong KW. Identification of negative and positive estrogen response elements in human GnRH upstream promoter in the placental JEG-3 cells. *Mol Cell Endocrinol* 2001; 184:125–134.
  47. Dong KW, Duval P, Zeng Z, Gordon K, Williams RF, Hodgen GD, Jones G, Kerdellhue B, Roberts JL. Multiple transcription start sites for the GnRH gene in rhesus and cynomolgus monkeys: a non-human primate model for studying GnRH gene regulation. *Mol Cell Endocrinol* 1996; 117:121–130.
  48. Wierman ME, Kepa JK, Sun W, Gordon DF, Wood WM. Estrogen negatively regulates rat gonadotropin releasing hormone (rGnRH) promoter activity in transfected placental cells. *Mol Cell Endocrinol* 1992; 86:1–10.
  49. Gaido KW, Leonard LS, Maness SC, Hall JM, McDonnell DP, Saviile B, Safe S. Differential interaction of the methoxychlor metabolite 2,2-bis-(*p*-hydroxyphenyl)-1,1,1-trichloroethane with estrogen receptors alpha and beta. *Endocrinology* 1999; 140:5746–5753.
  50. Bowe J, Li XF, Sugden D, Katzenellenbogen JA, Katzenellenbogen BS, O'Byrne KT. The effects of the phytoestrogen, coumestrol, on gonadotropin-releasing hormone (GnRH) mRNA expression in GT1-7 GnRH neurones. *J Neuroendocrinol* 2003; 15:105–108.
  51. Sun J, Meyers MJ, Fink B, Rajendran R, Katzenellenbogen J, Katzenellenbogen BS. Novel ligands that function as selective estrogens or antiestrogens for estrogen receptor-alpha or estrogen receptor-beta. *Endocrinology* 1999; 140:800–804.
  52. Shiau AK, Barstad D, Radek JT, Meyers MJ, Nettles KW, Katzenellenbogen BS, Katzenellenbogen JA, Agard DA, Greene GL. Structural characterization of a subtype-selective ligand reveals a novel mode of estrogen receptor antagonism. *Nat Struct Biol* 2002; 9:359–364.
  53. Nuedling S, Karas RH, Mendelsohn ME, Katzenellenbogen JA, Katzenellenbogen BS, Meyer R, Vetter H, Grohe C. Activation of estrogen receptor beta is a prerequisite for estrogen-dependent upregulation of nitric oxide synthases in neonatal rat cardiac myocytes. *FEBS Lett* 2001; 502:103–108.
  54. Zoeller RT, Seeburg PH, Young WSI. In situ hybridization histochemistry for messenger ribonucleic acid (mRNA) encoding gonadotropin-releasing hormone (GnRH): effect of estrogen on cellular levels of GnRH mRNA in female rat brain. *Endocrinology* 1988; 122:2570–2577.
  55. Toranzo D, Dupont E, Simard J, Labrie C, Couet J, Labrie F, Pelletier G. Regulation of pro-gonadotropin-releasing hormone gene expression by sex steroids in the brain of male and female rats. *Mol Endocrinol* 1989; 3:1748–1756.
  56. Petersen SL, McCrone S, Keller M, Shores S. Effects of estrogen and progesterone on luteinizing hormone-releasing hormone messenger ribonucleic acid levels: considerations of temporal and neuro-anatomical variables. *Endocrinology* 1995; 136:3604–3610.
  57. Wray S, Zoeller RT, Gainer H. Differential effects of estrogen on luteinizing hormone-releasing hormone gene expression in slice explant cultures prepared from specific rat forebrain regions. *Mol Endocrinol* 1989; 3:1197–1206.
  58. Pelletier G, Labrie C, Martel C, Li S, Labrie F. Role of extra-ovarian oestrogens in the regulation of gonadotropin releasing hormone mRNA expression in the rat brain. *J Neuroendocrinol* 2001; 13:678–682.
  59. Dhillon H, Dunn AM, Esquivel E, Hamernik DL, Wise ME. The estradiol-induced luteinizing hormone surge in the ewe is not associated with increased gonadotropin-releasing hormone messenger ribonucleic acid levels. *Biol Reprod* 1997; 57:107–111.
  60. Harris TG, Robinson JE, Evans NP, Skinner DC, Herbison AE. Gonadotropin-releasing hormone messenger ribonucleic acid expression changes before the onset of the estradiol-induced luteinizing hormone surge in the ewe. *Endocrinology* 1998; 139:57–64.
  61. Rance NE, Uswandi SV. Gonadotropin-releasing hormone gene expression is increased in the medial basal hypothalamus of postmenopausal women. *J Clin Endocrinol Metab* 1996; 81:3540–3546.
  62. El Majdoubi M, Sahu A, Plant TM. Effect of estrogen on hypothalamic transforming growth factor alpha and gonadotropin-releasing hormone and other hypothalamic peptides in the adult male rhesus monkey (*Macaca mulatta*). *Neuroendocrinology* 1998; 67:228–235.
  63. Krajewski SJ, Abel TW, Voytko ML, Rance NE. Ovarian steroids differentially modulate the gene expression of gonadotropin-releasing hormone neuronal subtypes in the ovariectomized cynomolgus monkey. *J Clin Endocrinol Metab* 2003; 88:655–662.
  64. Petersen SL, McCrone S, Shores S. Localized changes in LHRH mRNA levels as cellular correlates of the positive feedback effects of estrogen on LHRH neurons. *Am Zool* 1993; 33:255–265.
  65. Park OK, Gugneja S, Mayo KE. Gonadotropin-releasing hormone gene expression during the rat estrous cycle: effects of pentobarbital and ovarian steroids. *Endocrinology* 1990; 127:365–372.
  66. Marks DL, Lent KL, Rossmanith WG, Clifton DK, Steiner RA. Activation-dependent regulation of galanin gene expression in gonadotropin-releasing hormone neurons in the female rat. *Endocrinology* 1994; 134:1991–1998.
  67. Finn PD, Steiner RA, Clifton DK. Temporal patterns of gonadotropin-releasing hormone (GnRH), c-fos, and galanin gene expression in GnRH neurons relative to the luteinizing hormone surge in the rat. *J Neurosci* 1998; 18:713–719.
  68. Roberts JL, Dutlow CM, Jakubowski M, Blum M, Millar RP. Estradiol stimulates preoptic area-anterior hypothalamic proGnRH-GAP gene expression in ovariectomized rats. *Mol Brain Res* 1989; 6:127–134.
  69. Rosie R, Thomson E, Fink G. Oestrogen positive feedback stimulates the synthesis of LHRH mRNA in neurones of the rostral diencephalon of the rat. *J Endocrinol* 1990; 124:285–289.
  70. Petersen SL, Cheuk C, Hartman RD, Barraclough CA. Medial preoptic microimplants of the antiestrogen, Keoxifene, affect luteinizing hormone-releasing hormone mRNA levels, median eminence luteinizing hormone-releasing hormone concentrations and luteinizing hormone release in ovariectomized, estrogen-treated rats. *J Neuroendocrinol* 1989; 1:279–289.
  71. Bakker J, Baum MJ. Neuroendocrine regulation of GnRH release in induced ovulators. *Front Neuroendocrinol* 2000; 21:220–262.
  72. Caraty A, Fabre-Nys C, Delaleu B, Locatelli A, Bruneau G, Karsch FJ, Herbison A. Evidence that the mediobasal hypothalamus is the primary site of action of estradiol in inducing the preovulatory gonadotropin releasing hormone surge in the ewe. *Endocrinology* 1998; 139:1752–1760.
  73. Simerly RB. Anatomical substrates of hypothalamic integration. In: Paxinos G (ed.), *The Rat Nervous System*, 2nd ed. Sydney: Academic Press; 1995:354–356.
  74. Swanson LW. *Brain Maps: Structure of the Rat Brain*. New York: Elsevier; 1998.
  75. König JFR, Klippel RA. *The Rat Brain. A Stereotaxic Atlas of the Forebrain and Lower Parts of the Brain Stem*. Huntington, NY: Robert E. Krieger; 1967.
  76. Wiegand SJ, Terasawa E, Bridson WE, Goy RW. Effects of discrete lesions of preoptic and suprachiasmatic structures in the female rat. Alterations in the feedback regulation of gonadotropin secretion. *Neuroendocrinology* 1980; 31:147–157.
  77. Wiegand SJ, Terasawa E. Discrete lesions reveal functional heterogeneity of suprachiasmatic structures in regulation of gonadotropin secretion in the female rat. *Neuroendocrinology* 1982; 34:395–404.
  78. Ronnekleiv OK, Kelly MJ. Luteinizing hormone-releasing hormone neuronal system during the estrous cycle of the female rat: effects of surgically induced persistent estrus. *Neuroendocrinology* 1986; 43:564–576.
  79. Simerly RB. Organization and regulation of sexually dimorphic neuroendocrine pathways. *Behav Brain Res* 1998; 92:195–203.
  80. Simerly RB, Chang C, Muramatsu M, Swanson LW. Distribution of androgen and estrogen receptor mRNA-containing cells in the rat brain: an in situ hybridization study. *J Comp Neurol* 1990; 294:76–95.
  81. Shughrue PJ, Lane MV, Merchenthaler I. Comparative distribution of estrogen receptor-alpha and -beta mRNA in the rat central nervous system. *J Comp Neurol* 1997; 388:507–525.
  82. Bloch GJ, Kurth SM, Akesson TR, Micevych PE. Estrogen-concentrating cells within cell groups of the medial preoptic area: sex differences and co-localization with galanin-immunoreactive cells. *Brain Res* 1992; 595:301–308.
  83. Gu GB, Simerly RB. Projections of the sexually dimorphic anteroventral periventricular nucleus in the female rat. *J Comp Neurol* 1997; 384:142–164.
  84. Le WW, Berghorn KA, Rassnick S, Hoffman GE. Periventricular preoptic area neurons coactivated with luteinizing hormone (LH)-releasing hormone (LHRH) neurons at the time of the LH surge are LHRH afferents. *Endocrinology* 1999; 140:510–519.
  85. Watson RE Jr, Langub MC Jr, Engle MG, Maley BE. Estrogen-receptive neurons in the anteroventral periventricular nucleus are synaptic targets of the suprachiasmatic nucleus and peri-suprachiasmatic region. *Brain Res* 1995; 689:254–264.
  86. De La Iglesia HO, Blaustein JD, Bittman EL. Oestrogen receptor-



- alpha-immunoreactive neurones project to the suprachiasmatic nucleus of the female Syrian hamster. *J Neuroendocrinol* 1999; 11:481–490.
87. Chappell PE, Lee J, Levine JE. Stimulation of gonadotropin-releasing hormone surges by estrogen. II. Role of cyclic adenosine 3'/5'-monophosphate. *Endocrinology* 2000; 141:1486–1492.
  88. Donoso AO, Seltzer AM, Navarro CE, Cabrera RJ, Lopez FJ, Negro-Vilar A. Regulation of luteinizing hormone-releasing hormone and luteinizing hormone secretion by hypothalamic amino acids. *Braz J Med Biol Res* 1994; 27:921–932.
  89. McCann SM, Rettori V. Gamma amino butyric acid (GABA) controls anterior pituitary hormone secretion. *Adv Biochem Psychopharmacol* 1986; 42:173–189.
  90. Terasawa E. Control of luteinizing hormone-releasing hormone pulse generation in nonhuman primates. *Cell Mol Neurobiol* 1995; 15:141–164.
  91. Grumbach MM. The neuroendocrinology of human puberty revisited. *Horm Res* 2002; 57(suppl 2):2–14.
  92. Flugge G, Oertel WH, Wuttke W. Evidence for estrogen-receptive GABAergic neurones in the preoptic/anterior hypothalamic area of the rat brain. *Neuroendocrinology* 1985; 43:1–5.
  93. Curran-Rauhut MA, Petersen SL. Regulation of glutamic acid decarboxylase 65 and 67 gene expression by ovarian steroids: Identification of two functionally distinct populations of GABA neurons in the preoptic area. *J Neuroendocrinol* 2002; 14:310–317.
  94. Jarry H, Perschl A, Wuttke W. Further evidence that preoptic anterior hypothalamic GABAergic neurons are part of the GnRH pulse and surge generator. *Acta Endocrinol (Copenh)* 1988; 118:573–579.
  95. Jarry H, Hirsch B, Leonhardt S, Wuttke W. Amino acid neurotransmitter release in the preoptic area of rats during the positive feedback actions of estradiol on LH release. *Neuroendocrinology* 1992; 56:133–140.
  96. Jarry H, Leonhardt S, Schwarze T, Wuttke W. Preoptic rather than mediobasal hypothalamic amino acid neurotransmitter release regulates GnRH secretion during the estrogen-induced LH surge in the ovariectomized rat. *Neuroendocrinology* 1995; 62:479–486.
  97. Shughrue PJ, Lane MV, Merchenthaler I. Regulation of progesterone receptor messenger ribonucleic acid in the rat medial preoptic nucleus by estrogenic and antiestrogenic compounds: an in situ hybridization study. *Endocrinology* 1997; 138:5476–5484.
  98. Chappell PE, Levine JE. Stimulation of gonadotropin-releasing hormone surges by estrogen. I. Role of hypothalamic progesterone receptors. *Endocrinology* 2000; 144:1477–1485.
  99. Chappell PE, Levine JE. Progesterone receptor antisense oligonucleotides block LH surges in ovariectomized, estrogen-primed rats. In: Program of the 26th annual meeting of the Society for Neuroscience; 1997; Washington, DC. Abstract 379.377.
  100. Chappell PE, Levine JE. Stimulation of gonadotropin-releasing hormone surges by estrogen. I. Role of hypothalamic progesterone receptors. *Endocrinology* 2000; 141:1477–1485.
  101. Petersen SL, McCrone S, Coy D, Adelman JP, Mahan LC. GABA<sub>A</sub> receptor subunit mRNAs in cells of the preoptic area: colocalization with LHRH mRNA using dual-label in situ hybridization histochemistry. *Endocr J* 1993; 1:29–34.
  102. Jung H, Shannon EM, Fritschy JM, Ojeda SR. Several GABA<sub>A</sub> receptor subunits are expressed in LHRH neurons of juvenile female rats. *Brain Res* 1998; 780:218–229.
  103. Sim JA, Skynner MJ, Pape JR, Herbison AE. Late postnatal reorganization of GABA(A) receptor signalling in native GnRH neurons. *Eur J Neurosci* 2000; 12:3497–3504.
  104. Pape JR, Skynner MJ, Sim JA, Herbison AE. Profiling gamma-aminobutyric acid (GABA(A)) receptor subunit mRNA expression in postnatal gonadotropin-releasing hormone (GnRH) neurons of the male mouse with single cell RT-PCR. *Neuroendocrinology* 2001; 74:300–308.
  105. van den Pol AN, Wuarin JP, Dudek FE. Glutamate, the dominant excitatory transmitter in neuroendocrine regulation. *Science* 1990; 250:1276–1278.
  106. Jarry H, Leonhardt S, Wuttke W. Preoptic rather than mediobasal hypothalamic amino acid neurotransmitter release regulates GnRH secretion during the estrogen-induced LH surge in the ovariectomized rat. *Neuroendocrinology* 1992; 62:479–486.
  107. Dhandapani KM, Brann DW. The role of glutamate and nitric oxide in the reproductive neuroendocrine system. *Biochem Cell Biol* 2000; 78:165–179.
  108. Gore AC. Gonadotropin-releasing hormone neurons, NMDA receptors, and their regulation by steroid hormones across the reproductive life cycle. *Brain Res Brain Res Rev* 2001; 37:235–248.
  109. Terasawa E. Luteinizing hormone-releasing hormone (LHRH) neurons: mechanism of pulsatile LHRH release. *Vitam Horm* 2001; 63:91–129.
  110. Ottem EN, Godwin J, Petersen SL. Glutamatergic signaling through the NMDA receptor directly activates medial subpopulations of luteinizing hormone-releasing hormone (LHRH) neurons, but does not appear to mediate effects of estradiol on LHRH gene expression. *Endocrinology* 2002; 143:4837–4845.
  111. Gore AC, Wu TJ, Rosenberg JJ, Roberts JL. Gonadotropin-releasing hormone and NMDA receptor gene expression and colocalization change during puberty in female rats. *J Neurosci* 1996; 16:5281–5289.
  112. Gore AC, Oung T, Woller MJ. Age-related changes in hypothalamic gonadotropin-releasing hormone and *N*-methyl-D-aspartate receptor gene expression, and their regulation by oestrogen, in the female rat. *J Neuroendocrinol* 2002; 14:300–309.
  113. Eyigor O, Jennes L. Identification of glutamate receptor subtype mRNAs in gonadotropin-releasing hormone neurons in rat brain. *Endocrine* 1996; 4:133–139.
  114. Eyigor O, Jennes L. Expression of glutamate receptor subunit mRNAs in gonadotropin-releasing hormone neurons during the sexual maturation of the female rat. *Neuroendocrinology* 1997; 66:122–129.
  115. Bellocchio EE, Hu H, Pohorille A, Chan J, Pickel VM, Edwards RH. The localization of the brain-specific inorganic phosphate transporter suggests a specific presynaptic role in glutamatergic transmission. *J Neurosci* 1998; 18:8648–8659.
  116. Bellocchio EE, Reimer RJ, Freneau RT Jr, Edwards RH. Uptake of glutamate into synaptic vesicles by an inorganic phosphate transporter. *Science* 2000; 289:957–960.
  117. Takamori S, Rhee JS, Rosenmund C, Jahn R. Identification of a vesicular glutamate transporter that defines a glutamatergic phenotype in neurons. *Nature* 2000; 407:189–194.
  118. Takamori S, Rhee JS, Rosenmund C, Jahn R. Identification of differentiation-associated brain-specific phosphate transporter as a second vesicular glutamate transporter (VGLUT2). *J Neurosci* 2001; 21:RC182.
  119. Bai L, Xu H, Collins JF, Ghishan FK. Molecular and functional analysis of a novel neuronal vesicular glutamate transporter. *J Biol Chem* 2001; 276:36764–36769.
  120. Freneau RT Jr, Troyer MD, Pahner I, Nygaard GO, Tran CH, Reimer RJ, Bellocchio EE, Fortin D, Storm-Mathisen J, Edwards RH. The expression of vesicular glutamate transporters defines two classes of excitatory synapse. *Neuron* 2001; 31:247–260.
  121. Herzog E, Belenchi GC, Gras C, Bernard V, Ravassard P, Bedet C, Gasnier B, Giros B, El Mestikawy S. The existence of a second vesicular glutamate transporter specifies subpopulations of glutamatergic neurons. *J Neurosci* 2001; 21:RC181.
  122. Freneau RT Jr, Burman J, Qureshi T, Tran CH, Proctor J, Johnson J, Zhang H, Sulzer D, Copenhagen DR, Storm-Mathisen J, Reimer RJ, Chaudhry FA, Edwards RH. The identification of vesicular glutamate transporter 3 suggests novel modes of signaling by glutamate. *Proc Natl Acad Sci U S A* 2002; 99:14488–14493.
  123. Gras C, Herzog E, Belenchi GC, Bernard V, Ravassard P, Pohl M, Gasnier B, Giros B, El Mestikawy S. A third vesicular glutamate transporter expressed by cholinergic and serotonergic neurons. *J Neurosci* 2002; 22:5442–5451.
  124. Kaneko T, Fujiyama F. Complementary distribution of vesicular glutamate transporters in the central nervous system. *Neurosci Res* 2002; 42:243–250.
  125. Takamori S, Malherbe P, Broger C, Jahn R. Molecular cloning and functional characterization of human vesicular glutamate transporter 3. *EMBO Rep* 2002; 3:798–803.
  126. Varoqui H, Schafer MK, Zhu H, Weihe E, Erickson JD. Identification of the differentiation-associated Na<sup>+</sup>/PI transporter as a novel vesicular glutamate transporter expressed in a distinct set of glutamatergic synapses. *J Neurosci* 2002; 22:142–155.
  127. Ziegler DR, Cullinan WE, Herman JP. Distribution of vesicular glutamate transporter mRNA in rat hypothalamus. *J Comp Neurol* 2002; 448:217–229.
  128. Lin W, McKinney K, Lakhani S, Jennes L. Localization of neuron-specific vesicular glutamate transporter-2 mRNA and protein in the septum-preoptic region of the female rat. In: Program of the 84th annual meeting of the Endocrine Society; 2002; San Francisco, CA. Abstract P1–199.
  129. Lin W, McKinney K, Liu L, Lakhani S, Jennes L. Distribution of

- vesicular glutamate transporter-2 messenger ribonucleic acid and protein in the septum-hypothalamus of the rat. *Endocrinology* 2003; 144:662–670.
130. Hoffman GE, Schulterbrandt TG, Le WW. Possible sites of glutamatergic regulation of LHRH neurons. In: Program for the 2002 annual meeting of the Society for Neuroscience; 2002; Orlando, FL. Abstract 319.1.
131. Ferris CF, Pan JX, Singer EA, Boyd ND, Carraway RE, Leeman SE. Stimulation of luteinizing hormone release after stereotaxic microinjection of neurotensin into the medial preoptic area of rats. *Neuroendocrinology* 1984; 38:145–151.
132. Akema T, Praputpittaya C, Kimura F. Effects of preoptic microinjection of neurotensin on luteinizing hormone secretion in unanesthetized ovariectomized rats with or without estrogen priming. *Neuroendocrinology* 1987; 46:345–349.
133. Alexander MJ, Dobner PR, Miller MA, Bullock BP, Dorsa DM, Leeman SE. Estrogen induces neurotensin/neuromedin N messenger ribonucleic acid in a preoptic nucleus essential for the preovulatory surge of luteinizing hormone in the rat. *Endocrinology* 1989; 125:2111–2117.
134. Alexander MJ, Leeman SE. Neurotensin gene expression in the rat preoptic area. Implications for the regulation of reproduction. *Ann N Y Acad Sci* 1992; 668:70–89.
135. Smith MJ, Wise PM. Neurotensin gene expression increases during proestrus in the rostral medial preoptic nucleus: potential for direct communication with gonadotropin-releasing hormone neurons. *Endocrinology* 2001; 142:3006–3013.
136. Smith MJ, Jennes L. Neural signals that regulate GnRH neurones directly during the oestrous cycle. *Reproduction* 2001; 122:1–10.
